## Transient patterns of functional dysconnectivity in youth with psychosis spectrum symptoms

Eva Mennigen<sup>1</sup>, Dietsje D. Jolles<sup>2</sup>, Catherine E. Hegarty<sup>2</sup>, Mohan Gupta<sup>2</sup>, Maria Jalbrzikowski<sup>3</sup>,

Loes M. Olde Loohuis<sup>4</sup>, Roel A. Ophoff<sup>1,4</sup>, Katherine H. Karlsgodt<sup>2,1</sup>, & Carrie E. Bearden<sup>1,2</sup>

<sup>1</sup> Department of Psychiatry and Biobehavioral Sciences, Semel Institute for Neuroscience and Human Behavior, University of California, Los Angeles, USA

<sup>2</sup> Department of Psychology, University of California, Los Angeles, Los Angeles, CA, USA

<sup>3</sup> Department of Psychiatry, University of Pittsburgh, Pittsburgh, PA, USA

<sup>4</sup> Center for Neurobehavioral Genetics, University of California, Los Angeles, Los Angeles, CA, USA

### Corresponding Author

Carrie E. Bearden, PhD

UCLA Semel Institute for Neuroscience & Human Behavior

760 Westwood Plaza,

Los Angeles, CA 90095

[cbearden@mednet.ucla.edu](mailto:cbearden@mednet.ucla.edu)

Keywords: dynamic functional network connectivity, psychosis spectrum, independent component analysis, adolescence

## Abstract

Psychosis spectrum disorders are conceptualized as neurodevelopmental disorders accompanied by disruption of large-scale functional brain networks. Both static and dynamic dysconnectivity have been described in patients with schizophrenia and, more recently, in help-seeking individuals at clinical high-risk for psychosis. Less is known, however, about developmental aspects of dynamic functional network connectivity (FNC) associated with psychotic symptoms (PS) in the general population. Here, we investigate resting state fMRI data using established dynamic FNC methods in the Philadelphia Neurodevelopmental Cohort (ages 8-22), including 129 participants experiencing PS and 452 participants without PS (non-PS).

Applying a sliding window approach and k-means clustering, 5 dynamic states with distinct whole-brain connectivity patterns were identified. PS-associated dysconnectivity was most prominent in states characterized by synchronization or antagonism of the default mode network (DMN) and cognitive control (CC) domains. Hyperconnectivity between DMN, salience, and CC domains in PS youth only occurred in a state characterized by synchronization of the DMN and CC domains, a state that also becomes less frequent with age. However, dysconnectivity of the sensorimotor and visual systems in PS youth was revealed in other transient states completing the picture of whole-brain dysconnectivity patterns associated with PS.

Overall, state-dependent dysconnectivity was observed in PS youth, providing the first evidence that disruptions of dynamic functional connectivity are present across a broader psychosis continuum.

## Introduction

Substantial evidence now indicates that psychotic symptoms (PS) occur on a continuum ranging from sub-threshold PS to full-blown psychotic disorders such as schizophrenia.<sup>1-3</sup> Clinically, PS include abnormalities of perception, emotion, and cognition that vary in severity, frequency, and level of conviction across the psychosis spectrum.<sup>4,5</sup> Traditionally, individuals on the severe end of this continuum have been studied. But more recently, there has been increasing interest in individuals experiencing a broader spectrum of PS. First, because they are at increased risk of progressing to overt illness,<sup>6,7</sup> but secondly because they offer the opportunity to explore neural changes in the absence of confounds from medication or disease chronicity.

The psychosis continuum is considered to have neurodevelopmental underpinnings concomitant with altered brain and cognitive maturation.<sup>8-12</sup> Symptoms of many psychiatric illnesses typically appear during adolescence, a sensitive period of brain development,<sup>13-15</sup> and frequency of PS peaks in late childhood and adolescence.<sup>2,16</sup> Therefore, brain imaging studies of youth experiencing PS are likely to be informative regarding neural substrates of developmental vulnerability to psychosis. Publicly available data from the Philadelphia Neurodevelopmental Cohort (PNC) utilized in the current study offer an unprecedented opportunity to study neural substrates of PS from late-childhood through adolescence and early adulthood, overlapping with critical periods for the onset of many neuropsychiatric disorders.<sup>17,18</sup>

There is now a wealth of evidence that disruption of large-scale synchronized neural connectivity plays a role in the pathophysiology of schizophrenia.<sup>19-21</sup> Functional connectivity describes the correlated temporal fluctuations of distant brain areas, and is often assessed during resting state functional magnetic resonance imaging (rs-fMRI) while participants are not engaged in a particular task.<sup>22-24</sup> In terms of static functional connectivity, which reflects the average

connectivity across the entire resting state scan, previous findings in PS youth in this cohort include hyperconnectivity within the default mode network (DMN) that was associated with poorer cognitive performance, and hypoconnectivity within the cognitive control (CC) domain.<sup>11</sup> These patterns resemble those observed in patients with overt schizophrenia, as well as in help-seeking individuals at clinical high-risk (CHR) for psychosis.

Only recently has it emerged that functional connectivity is not static, but rather a dynamic process that exhibits considerable fluctuations across the duration of a typical resting state scan.<sup>25–27</sup> Indeed, dynamic or state effects are as important as static or trait effects in determining individual functional connectivity patterns. Greater variability in network activity is associated with increased capacity for information processing,<sup>28</sup> and thus may index better overall ‘brain health’.<sup>29,30</sup> With the emergence of new methods, we are now poised to explore the dynamics of functional dysconnectivity related to PS.<sup>26,31–34</sup>

Recently, we investigated dynamic functional network connectivity (FNC) utilizing a sliding window approach<sup>31</sup> to identify recurring whole brain connectivity patterns in treatment-seeking CHR youth.<sup>35</sup> Abnormalities were only observed within specific dynamic states, and overall fluctuations of connectivity across dynamic states in CHR individuals were reduced relative to healthy controls. Further, CHR individuals exhibit qualitatively similar, but milder, dysconnectivity relative to patients with schizophrenia.<sup>36</sup> Applying a different approach to capture dynamic aspects of functional connectivity,<sup>33</sup> Barber et al. investigated individuals endorsing PS who were otherwise healthy;<sup>37</sup> individuals with PS spent more time in states that showed intra-DMN hypoconnectivity, consistent with findings in patients with overt schizophrenia.<sup>38,39</sup>

The aim of the current study was to investigate whole-brain dynamic FNC and associated summary metrics in PS youth relative to their peers who do not experience PS (non-PS) across late childhood, adolescence, and early adulthood.

## Methods

### *Study participants*

An ethnically and socioeconomically diverse community sample of participants aged 8 to 22 years was included in the PNC study. This study was not designed to ascertain individuals with particular neuropsychiatric disorders, but instead recruited participants broadly from the Children's Hospital of Philadelphia.

Study participants (n=9,428) completed a computerized structured interview (GOASSESS) that included a psychopathology screening based on the National Institute of Mental Health Genetic Epidemiology Research Branch Kiddie – Schedule for Affective Disorders and Schizophrenia (K-SADS)<sup>40</sup> and a computerized neurocognitive battery (CNB)<sup>41</sup>. Multimodal MRI was acquired for a subsample of participants (n=1,445).<sup>42</sup>

Out of 799 participants with rs-fMRI scans, imaging data of 581 participants with available age and sex information passed quality control. Demographics for this sample are summarized in Table 1.

### *Clinical Interview*

GOASSESS was developed to allow for a large 'throughput' of participants. It provides screen-level symptom and episode information<sup>43</sup> and is based on the K-SADS. See Supplementary Material for additional information.

### *Psychosis Spectrum Classification*

We identified PS individuals in the cohort according to criteria used by Calkins et al.<sup>44</sup> Briefly, PS were rated based on the PRIME Screen-Revised<sup>45</sup> assessing positive symptoms, the K-SADS<sup>46</sup> for hallucinations and delusional symptoms, and the Scale of Prodromal Syndromes<sup>47</sup> assessing negative and disorganized symptoms (see Supplementary Material).

### *Resting state fMRI data and preprocessing*

Eyes-open rs-fMRI data were collected on a single scanner with 3T field strength over 6.2 minutes. FMRIB Software Library (FSL; <https://fsl.fmrib.ox.ac.uk/fsl>) and Analysis of Functional NeuroImages (AFNI; <https://afni.nimh.nih.gov>) tools were used for functional preprocessing that included slice time correction, motion correction, grand mean scaling, and smoothing (6mm kernel). Table 1 contains a comparison of motion parameters between groups.

See Supplementary Material for additional information.

*Table 1: Demographics and motion parameters*

| Group                        | Age<br>(SD)    | Sex<br>(%<br>female) | Ethnicity in %    |                   |                   | Maternal<br>education | Relative<br>movement | Maximum<br>movement | Spike<br>count |
|------------------------------|----------------|----------------------|-------------------|-------------------|-------------------|-----------------------|----------------------|---------------------|----------------|
|                              |                |                      | AA                | EA                | Other             |                       |                      |                     |                |
| <b>Non-<br/>PS<br/>n=452</b> | 15.2<br>(3.2)  | 55.3                 | 35.8 <sup>+</sup> | 54.2 <sup>+</sup> | 10.0 <sup>+</sup> | 14.4 (2.5) *          | 0.59 (0.29)<br>*     | 0.7 (0.59)          | 4.38<br>(5.3)  |
| <b>PS<br/>n=129</b>          | 15.00<br>(2.8) | 56.6                 | 57.4 <sup>+</sup> | 31.0 <sup>+</sup> | 11.6 <sup>+</sup> | 13.8 (2.2) *          | 0.65 (0.29)<br>*     | 0.77 (0.57)         | 5.24<br>(5.6)  |

Significant group difference ( $p < 0.05$ ): \* two-sample t-test, <sup>+</sup> Chi-square test; PS – psychosis spectrum; AA – African-American, EA – European-American

### *Group Independent Component Analysis*

Independent component analysis (ICA) is a special case of blind source separation and is widely applied to imaging data. RS-fMRI data were decomposed into cortical and subcortical

components using a high model order group-level spatial ICA<sup>48</sup> using the Group ICA fMRI toolbox (GIFT, <http://mialab.mrn.org/software/gift>).

Two independent raters (EM, DDJ) evaluated 59 out of 100 components as intrinsic connectivity networks (ICNs) based on the following criteria:<sup>49</sup> ICNs show peak activation in gray matter with no or minimal overlap with white matter, ventricles, or non-brain structures and ICNs show maximal power in lower frequencies (< 0.1 Hz). ICNs were assigned to the following 9 functional domains based on their anatomical location and prior scientific literature utilizing the automated anatomic labeling atlas<sup>50</sup> and neurosynth.org: subcortical, salience, auditory, sensorimotor, visual, cognitive control (CC), DMN, limbic, and cerebellum. Figure 1 shows the 9 functional domains with their assigned ICNs. See Supplementary Material for additional information.

*Figure 1: Nine functional domains and their assigned intrinsic connectivity networks*

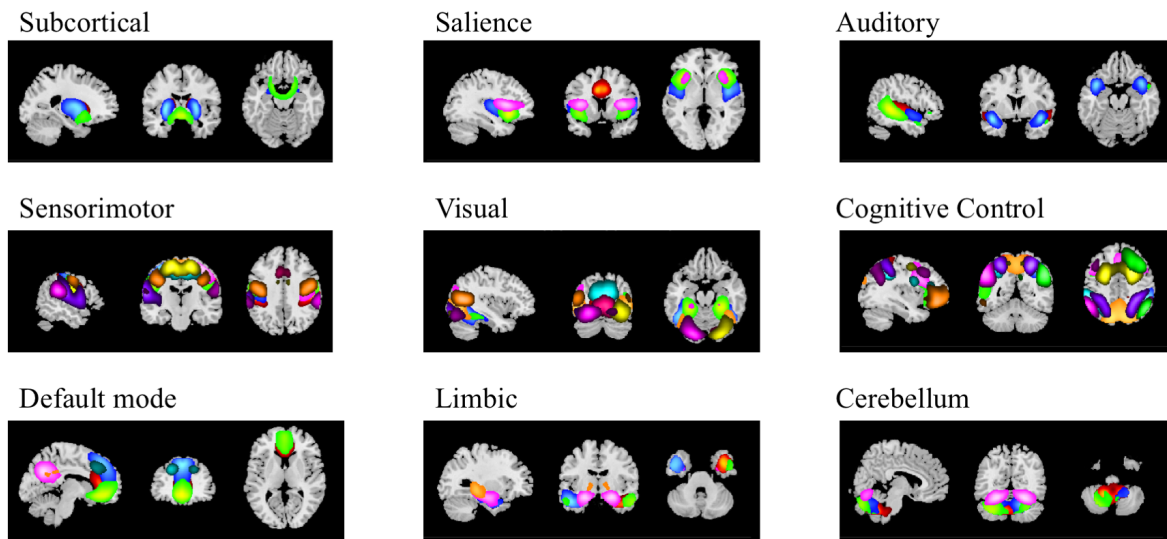

### *Dynamic FNC*

We applied a sliding temporal window approach to capture changes of whole-brain connectivity (Figure S1).<sup>31</sup> Briefly, a tapered window slides across concatenated time courses and for each window an FNC matrix consisting of ICN-to-ICN Pearson's correlations was calculated.

Next, from each participant, windows with the highest variance in FNC ('local extrema') were chosen to initialize clustering. K-means clustering was first performed on the local extrema with varying numbers of clusters  $k$  (2-20): The ratio of within- to between-cluster distances was plotted for each  $k$ . The turning point in the graph where the amount of additionally explained variance becomes marginal, and therefore reflecting the optimal number of clusters ('elbow criterion'), was five, which is typical for this type of analysis.<sup>51</sup>

These five cluster centroids were then used as starting points to cluster all windowed FNC matrices in such a way that each windowed FNC matrix was assigned to the one cluster with which it was most highly correlated. For each participant, each dynamic state is represented by the element-wise median connectivity across all windows assigned to this particular state. The five dynamic states are shown in Figure 2.



Figure 2: The five dynamic states identified, including their occurrence rates across all participants.

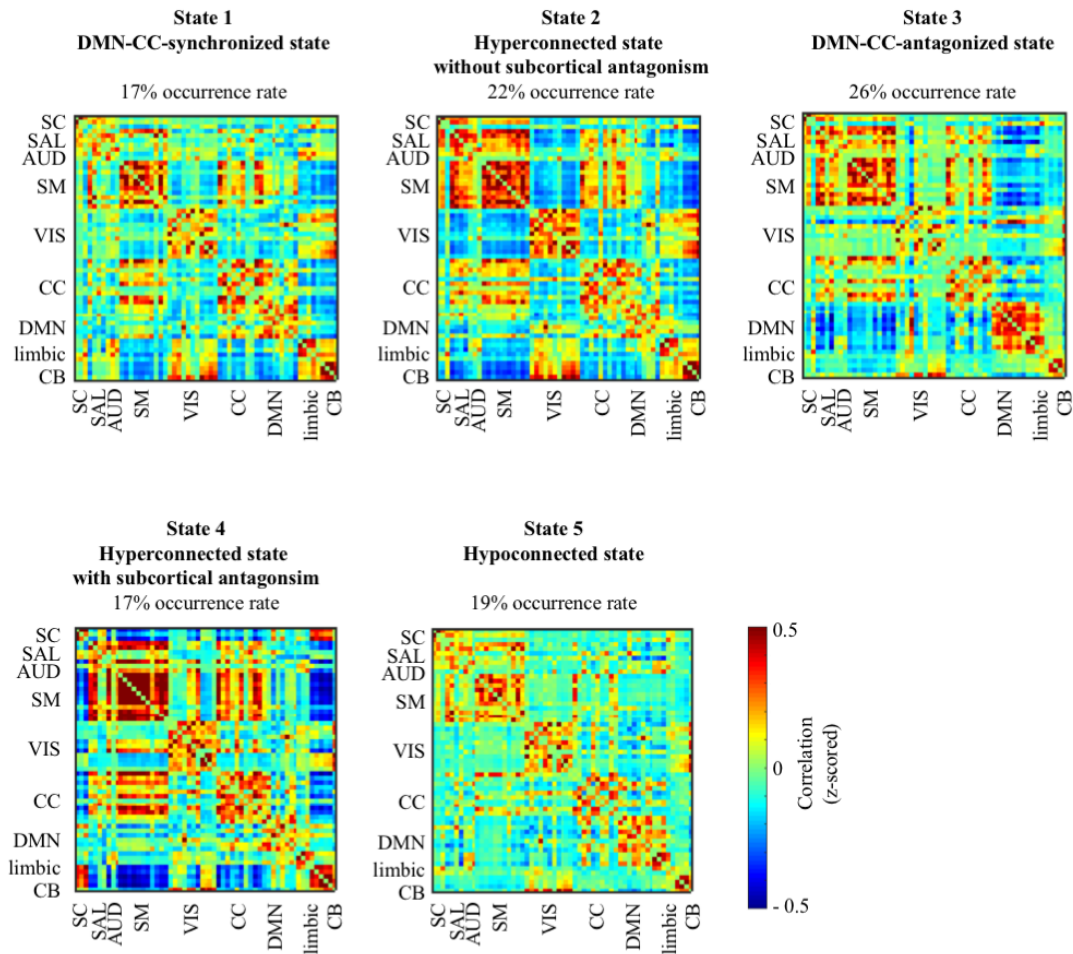

AUD – auditory domain, CC – cognitive control domain, CB – cerebellum, DMN – default mode network, SAL – salience domain, SC – subcortical, SM – sensorimotor domain, VIS – visual domain

## Model selection

In order to account for important covariates but also to prevent the model from overfitting, we applied a multivariate backward model selection approach adapted from the MANCOVAN toolbox implemented in GIFT using the mSTEPWISE function.<sup>49</sup> Assuming that each dynamic state may be influenced differently by the covariates, statistical models were generated for each state separately. The initial full model for all dynamic states included the following variables:

group (non-PS vs. PS), sex, age, maternal education, and their interactions (see Supplementary Material).

The following models were selected for the five dynamic states:

- state 1:  $FNC \sim (\text{group, sex, age, group} * \text{sex}) * \beta + \epsilon$
- state 2:  $FNC \sim (\text{sex, age, maternal education}) * \beta + \epsilon$
- state 3:  $FNC \sim (\text{group, sex, age, maternal education}) * \beta + \epsilon$
- state 4:  $FNC \sim (\text{group, sex, age, maternal education, group} * \text{age, sex} * \text{maternal education}) * \beta + \epsilon$
- state 5:  $FNC \sim (\text{group, sex, age, maternal education, group} * \text{maternal education}) * \beta + \epsilon$

The reduced models were then used for further univariate tests.<sup>49</sup> Results were corrected for a false discovery rate (FDR) at  $q = 0.05$ .

### *Dynamic indices*

Based on the distinction of five discrete states, summary metrics reflecting the dynamic behavior of FNC across the scan can be derived. The mean dwell time (MDT) reflects the average time an individual lingers in one particular state before switching to a different state; the fraction of time (FT) summarizes the time across the entire scan that an individual spends in one particular state.

We applied the same backward model selection procedure as for the dynamic FNC analysis with the same set of covariates. The reduced models for FT and MDT included the covariates sex, age, and maternal education but not group. Results were FDR corrected at  $q = 0.05$ .

## Results

### *Dynamic FNC*

The five dynamic states are shown in Figure 2; their distinct connectivity patterns are described individually below. With regard to connectivity differences, we focus on results for our primary variable of interest, group (PS vs. non-PS), which was included as factor in the reduced models of states 1,3,4, and 5. Figure 3 shows significant group effects across dynamic states.

*Figure 3: ICN-to-ICN connections showing significant group effects in a) state 1, b) state 3, and c) state 5; d) ICN-to-ICN connections of significant group by age interaction effects in state 4. The scaling,  $-\text{sign}(t) * \log(p)$ , provides information on the effect size and direction. The cool color scale represents negative values, indicating hypoconnectivity (decreased positive correlation, or greater anti-correlation) in PS relative to non-PS youth; the hot color scale represents positive values indicating hyperconnectivity (increased positive correlation or less anti-correlation) in PS relative to non-PS youth.*

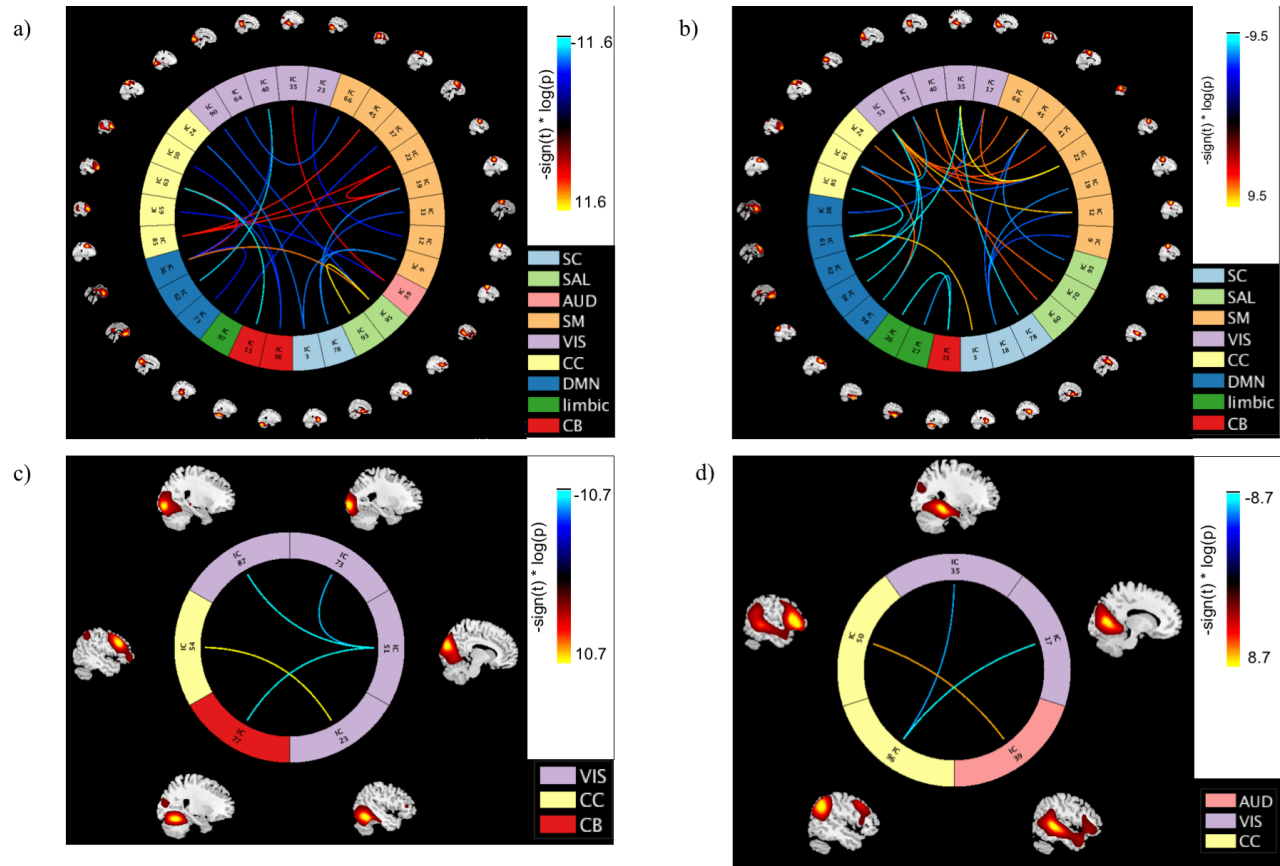

IC – Independent component; AUD – auditory domain, CC – cognitive control domain, CB – cerebellum, DMN – default mode network, SAL – salience domain, SC – subcortical domain, SM – sensorimotor domain, VIS – visual domain

### State 1 – DMN-CC domain-synchronized state

Across all participants, 17% of all windows were assigned to this state. For the most part, DMN and CC domains appear synchronized in this state: they show high positive connectivity with each other, and form one functional domain. Together they exhibit negative connectivity with the limbic domain and the cerebellum. Further, state 1 shows anti-correlation between the sensorimotor domain and limbic and cerebellar domains.

In this state, twenty-four ICN-to-ICN connectivity pairs show a significant group effect (Figure 3a, Table 2). In general, PS youth exhibit reduced connectivity between the CC domain with multiple other domains (auditory, cerebellar, subcortical) as well as between the sensorimotor

domain with visual and subcortical domains and reduced intra-domain connectivity within the DMN. In contrast, increased inter-domain connectivity in PS relative to non-PS youth is observed between the CC domain with the DMN and the sensorimotor domains, as well as between auditory and visual domains, salience domain and DMN, and increased *intra*-domain connectivity within the salience domain.

*Table 2: ICN-to-ICN connectivity pairs that show significant group effects in state 1 (DMN-CC-synchronized state), ordered by domains.*

| ICN 1                               | ICN 2                        | Domains | p-value | t-value | Mean connectivity |       | Relationship |
|-------------------------------------|------------------------------|---------|---------|---------|-------------------|-------|--------------|
|                                     |                              |         |         |         | Non-PS            | PS    |              |
| Posterior Middle Temporal Gyrus R+L | Inferior Frontal Gyrus R     | AUD-CC  | 0.0007  | -3.41   | 0.19              | 0.17  | PS < non-PS  |
| Posterior Middle Temporal Gyrus R+L | Fusiform Gyrus R+L           | AUD-VIS | 0.0008  | 3.38    | 0.02              | 0.09  | PS > non-PS  |
| Frontal Pole L                      | Cerebellum R+L               | CC-CB   | 0.0000  | -4.49   | 0.04              | -0.06 | PS < non-PS  |
| Frontal Pole L                      | Cerebellum R+L               | CC-CB   | 0.0002  | -3.69   | 0.01              | -0.04 | PS < non-PS  |
| Inferior Frontal Gyrus L            | Cerebellum R+L               | CC-CB   | 0.0007  | -3.40   | -                 | -0.12 | PS < non-PS  |
| Frontal Pole L                      | rACC                         | CC-DMN  | 0.0008  | 3.38    | -                 | 0.07  | PS > non-PS  |
| rACC                                | Precuneus                    | DMN-DMN | 0.0008  | -3.39   | 0.09              | 0.02  | PS < non-PS  |
| Anterior Insular R+L                | rACC                         | SAL-DMN | 0.0001  | 3.86    | 0.02              | 0.10  | PS > non-PS  |
| Anterior Insula R+L                 | Anterior Insular R+L         | SAL-SAL | 0.0000  | 4.26    | 0.21              | 0.28  | PS > non-PS  |
| Anterior Insular R+L                | Lingual Gyrus R+L            | SAL-VIS | 0.0005  | -3.53   | 0.02              | -0.03 | PS < non-PS  |
| Putamen R+L                         | Superior Parietal Lobule R+L | SC-CC   | 0.0002  | -3.79   | -                 | -0.15 | PS < non-PS  |
| Ventral Striatum                    | Postcentral Gyrus L          | SC-SM   | 0.0001  | -3.87   | -                 | -0.22 | PS < non-PS  |
| Ventral Striatum                    | Precentral Gyrus R+L         | SC-SM   | 0.0002  | -3.81   | -                 | -0.25 | PS < non-PS  |
| Putamen R+L                         | Postcentral Gyrus L          | SC-SM   | 0.0002  | -3.74   | -                 | -0.14 | PS < non-PS  |
| Ventral Striatum                    | Paracentral Lobule medial    | SC-SM   | 0.0004  | -3.56   | -                 | -0.23 | PS < non-PS  |
| Precentral Gyrus R+L                | Superior Frontal Gyrus       | SM-CC   | 0.0006  | 3.44    | 0.28              | 0.36  | PS > non-PS  |

|                         |                              |           |        |       |      |      |             |
|-------------------------|------------------------------|-----------|--------|-------|------|------|-------------|
| SMA                     | Superior Frontal Gyrus       | SM-CC     | 0.0007 | 3.43  | 0.42 | 0.47 | PS > non-PS |
| Precentral Gyrus R+L    | Superior Frontal Gyrus       | SM-CC     | 0.0009 | 3.35  | 0.31 | 0.35 | PS > non-PS |
| preSMA                  | Posterior Hippocampus R+L    | SM-limbic | 0.0006 | -3.45 | -    | 0.18 | PS < non-PS |
| Precentral Gyrus R+L    | Precentral Gyrus R+L         | SM-SM     | 0.0007 | 3.40  | 0.30 | 0.38 | PS > non-PS |
| Suparmarginal Gyrus R+L | Inferior Occipital Gyrus R+L | SM-VIS    | 0.0003 | -3.69 | -    | 0.03 | PS < non-PS |
| Postcentral Gyrus L     | Fusiform Gyrus R+L           | SM-VIS    | 0.0007 | -3.40 | -    | 0.15 | PS < non-PS |
| Precuneus               | rACC                         | VIS-DMN   | 0.0000 | -4.14 | 0.24 | 0.13 | PS < non-PS |
| Precuneus               | rACC                         | VIS-DMN   | 0.0004 | -3.56 | 0.06 | 0.00 | PS < non-PS |

ICN – Intrinsic connectivity network; PS – participants with psychosis spectrum symptoms; non-PS – participants without psychosis spectrum symptoms; R – right, L – left; CC – cognitive control domain, CB – cerebellum, DMN – default mode network, SAL – salience domain, SM – sensorimotor domain, VIS – visual domain; preSMA – presupplementary motor area, SMA – supplementary motor area; rACC – rostral anterior cingulate cortex

### State 2 – Hyperconnected state without subcortical antagonism

State 2 is characterized by increased intra-domain connectivity, particularly in the salience, sensorimotor, and cerebellar domains. The visual domain is strongly anticorrelated with the sensorimotor, salience, and subcortical domains. CC and DMN domains appear synchronized. 22% of all windowed FNC matrices were assigned to this state.

### State 3 – DMN-CC domain-antagonized state

In this state, each functional domain shows positive intra-domain connectivity with the exception of the visual domain. The DMN exhibits strong anti-correlation with the CC, salience, and sensorimotor domains. 26% of windowed FNC matrices were clustered into this pattern.

In state 3, 28 ICN-to-ICN connectivity pairs exhibit significant differences between groups (Figure 3b, Table 3). Here, connectivity involving the sensorimotor and visual domains is particularly affected in PS youth. PS participants show decreased inter-domain connectivity relative to non-PS youth of the sensorimotor domain with salience and subcortical domains, as

well as between the visual domain and the DMN, and between the limbic and cerebellar domains.

However, PS youth show relatively increased connectivity between the visual domain with sensorimotor and salience domains, and between the DMN and subcortical domains.

*Table 3: ICN-to-ICN connectivity pairs that show significant group effects in state 3 (DMN-CC-antagonized state), ordered by domains.*

| ICN 1                   | ICN 2                               | Domains   | p-value | t-value | Mean connectivity |       | Relationship |
|-------------------------|-------------------------------------|-----------|---------|---------|-------------------|-------|--------------|
|                         |                                     |           |         |         | Non-PS            | PS    |              |
| Superior Frontal Gyrus  | Superior Frontal Gyrus medial       | CC-DMN    | 0.0002  | -3.78   | -0.13             | -0.22 | PS < non-PS  |
| Frontal Pole L          | Middle Frontal Gyrus R+L            | CC-DMN    | 0.001   | 3.32    | 0.03              | 0.11  | PS > non-PS  |
| Temporal Pole           | Cerebellum R+L                      | Limbic-CB | 0.0001  | -4.00   | 0.04              | -0.04 | PS < non-PS  |
| Temporal Pole           | Cerebellum R+L                      | Limbic-CB | 0.0005  | -3.49   | 0.04              | -0.03 | PS < non-PS  |
| Anterior Insular R+L    | SMA                                 | SAL-SM    | 0.0007  | -3.43   | 0.07              | -0.01 | PS < non-PS  |
| Insular Cortex R+L      | Posterior Middle Temporal Gyrus R+L | SAL-VIS   | 0.0011  | 3.3     | -0.05             | 0.05  | PS > non-PS  |
| dACC                    | Precuneus                           | SAL-VIS   | 0.0013  | 3.24    | -0.26             | -0.20 | PS > non-PS  |
| Putamen R+L             | Superior Frontal Gyrus medial       | SC-DMN    | 0.0002  | 3.69    | -0.09             | -0.01 | PS > non-PS  |
| Putamen R+L             | Precentral Gyrus R+L                | SC-SM     | 0.0008  | -3.23   | 0.12              | 0.06  | PS < non-PS  |
| Putamen R+L             | SMA                                 | SC-SM     | 0.0013  | -3.23   | 0.2               | 0.13  | PS < non-PS  |
| Putamen R+L             | Postcentral Gyrus L                 | SC-SM     | 0.0013  | -3.23   | 0.13              | 0.07  | PS < non-PS  |
| Ventral Striatum        | Fusiform Gyrus R+L                  | SC-VIS    | 0.0003  | -3.67   | 0.07              | -0.01 | PS < non-PS  |
| Precentral Gyrus R+L    | Frontal Pole L                      | SM-CC     | 0.0013  | -3.24   | -0.01             | -0.08 | PS < non-PS  |
| Precentral Gyrus R+L    | Fusiform Gyrus R+L                  | SM-VIS    | 0.0001  | 3.97    | -0.13             | -0.05 | PS > non-PS  |
| Postcentral Gyrus L     | Posterior Middle Temporal Gyrus R+L | SM-VIS    | 0.0003  | 3.62    | -0.01             | 0.09  | PS > non-PS  |
| SMA                     | Precuneus                           | SM-VIS    | 0.0005  | 3.5     | -0.29             | -0.22 | PS > non-PS  |
| Supramarginal Gyrus R+L | Posterior Middle Temporal Gyrus R+L | SM-VIS    | 0.0009  | 3.35    | 0.04              | 0.15  | PS > non-PS  |
| Precentral Gyrus R+L    | Cuneus                              | SM-VIS    | 0.001   | 3.31    | 0.06              | 0.13  | PS > non-PS  |
| Precentral Gyrus R+L    | Lingual Gyrus R+L                   | SM-VIS    | 0.001   | 3.3     | -0.03             | 0.05  | PS > non-PS  |
| Precentral Gyrus R+L    | Posterior Middle Temporal Gyrus R+L | SM-VIS    | 0.0012  | 3.26    | -0.03             | 0.06  | PS > non-PS  |

|                                     |                                     |         |        |       |       |       |             |
|-------------------------------------|-------------------------------------|---------|--------|-------|-------|-------|-------------|
| Supramarginal Gyrus L               | Posterior Middle Temporal Gyrus R+L | SM-VIS  | 0.0014 | 3.22  | -0.01 | 0.09  | PS > non-PS |
| Cuneus                              | Frontal Pole L                      | VIS-CC  | 0.0005 | -3.49 | -0.07 | -0.15 | PS < non-PS |
| Posterior Middle Temporal Gyrus R+L | Superior Parietal Lobule R+L        | VIS-CC  | 0.0006 | 3.45  | 0.03  | 0.13  | PS > non-PS |
| Fusiform Gyrus R+L                  | rACC                                | VIS-DMN | 0.0002 | -3.81 | 0.08  | -0.01 | PS < non-PS |
| Posterior Middle Temporal Gyrus R+L | Angular Gyrus R+L                   | VIS-DMN | 0.0002 | -3.72 | 0.09  | -0.02 | PS < non-PS |
| Posterior Middle Temporal Gyrus R+L | Middle Frontal Gyrus R+L            | VIS-DMN | 0.0003 | -3.69 | 0.03  | -0.07 | PS < non-PS |
| Posterior Middle Temporal Gyrus R+L | rACC                                | VIS-DMN | 0.0006 | -3.48 | 0.07  | -0.04 | PS < non-PS |
| Lingual Gyrus R+L                   | rACC                                | VIS-DMN | 0.0013 | -3.24 | 0.00  | -0.06 | PS < non-PS |

ICN – Intrinsic connectivity network; PS – participants with psychosis spectrum symptoms; non-PS – participants without psychosis spectrum symptoms; R – right, L – left; AUD – auditory domain, CC – cognitive control domain, CB – cerebellum, DMN – default mode network, SAL – salience domain, SM – sensorimotor domain, VIS – visual domain; rACC – rostral anterior cingulate cortex, dACC – dorsal anterior cingulate cortex, SMA – supplementary motor area

#### State 4 – Hyperconnected state with subcortical antagonism

State 4 is characterized by increased intra-domain connectivity, particularly within the sensorimotor domain. Strong negative correlation is observed between the subcortical domain and sensorimotor, CC, and DMN domains, whereas connectivity between subcortical areas and the cerebellum is increased relative to the other states. The overall occurrence rate of this state was 17%.

Two ICN-to-ICN connectivity pairs show a significant group effect (Table 4, Figure 4). Since both pairs also exhibit a significant group by age interaction effect, only the interaction effect is considered. Specifically, PS youth exhibit age-associated decreases in connectivity between the right angular gyrus (CC domain) with both the lingual and fusiform gyri (visual domain), whereas non-PS participants show no change in connectivity with age. In contrast, connectivity increases with age between the posterior middle temporal gyrus (auditory domain) and the left inferior frontal gyrus (CC domain) in PS but not in non-PS youth.



*Table 4: ICN-to-ICN connectivity pairs in state 4 (hyperconnected state with subcortical antagonism) that show: a) significant group effects, and b) group by age interaction effects.*

| ICN1               | ICN2            | Domains | p-value | t-value | Mean connectivity |       | Relationship |
|--------------------|-----------------|---------|---------|---------|-------------------|-------|--------------|
|                    |                 |         |         |         | Non-PS            | PS    |              |
| Lingual Gyrus R+L  | Angular Gyrus R | VIS-DMN | 0.0001  | 3.84    | -0.12             | -0.11 | PS > non-PS  |
| Fusiform Gyrus R+L | Angular Gyrus R | VIS-DMN | 0.001   | 3.32    | -0.13             | -0.12 | PS > non-PS  |

a)

| ICN1                                | ICN2                     | Domains | p-value | t-value |
|-------------------------------------|--------------------------|---------|---------|---------|
| Lingual Gyrus R+L                   | Angular Gyrus R          | VIS-CC  | 0.0002  | -3.8    |
| Fusiform Gyrus R+L                  | Angular Gyrus R          | VIS-CC  | 0.001   | -3.29   |
| Posterior Middle Temporal Gyrus R+L | Inferior Frontal Gyrus L | AUD-CC  | 0.0008  | 3.39    |

ICN – Intrinsic connectivity network; PS – participants with psychosis spectrum symptoms; non-PS – participants without psychosis spectrum symptoms; R – right, L – left; CC – cognitive control domain, DMN – default mode network, VIS – visual domain

*Figure 4: Scatterplots of the significant group by age interaction in state 4, showing decreased connectivity with age in PS relative to non-PS youth between two ICN-to-ICN pairs: lingual gyri – right angular gyrus and fusiform gyri – right angular gyrus. In contrast, PS youth show increased connectivity with age between posterior middle temporal gyri – left inferior frontal gyrus, relative to non-PS youth.*

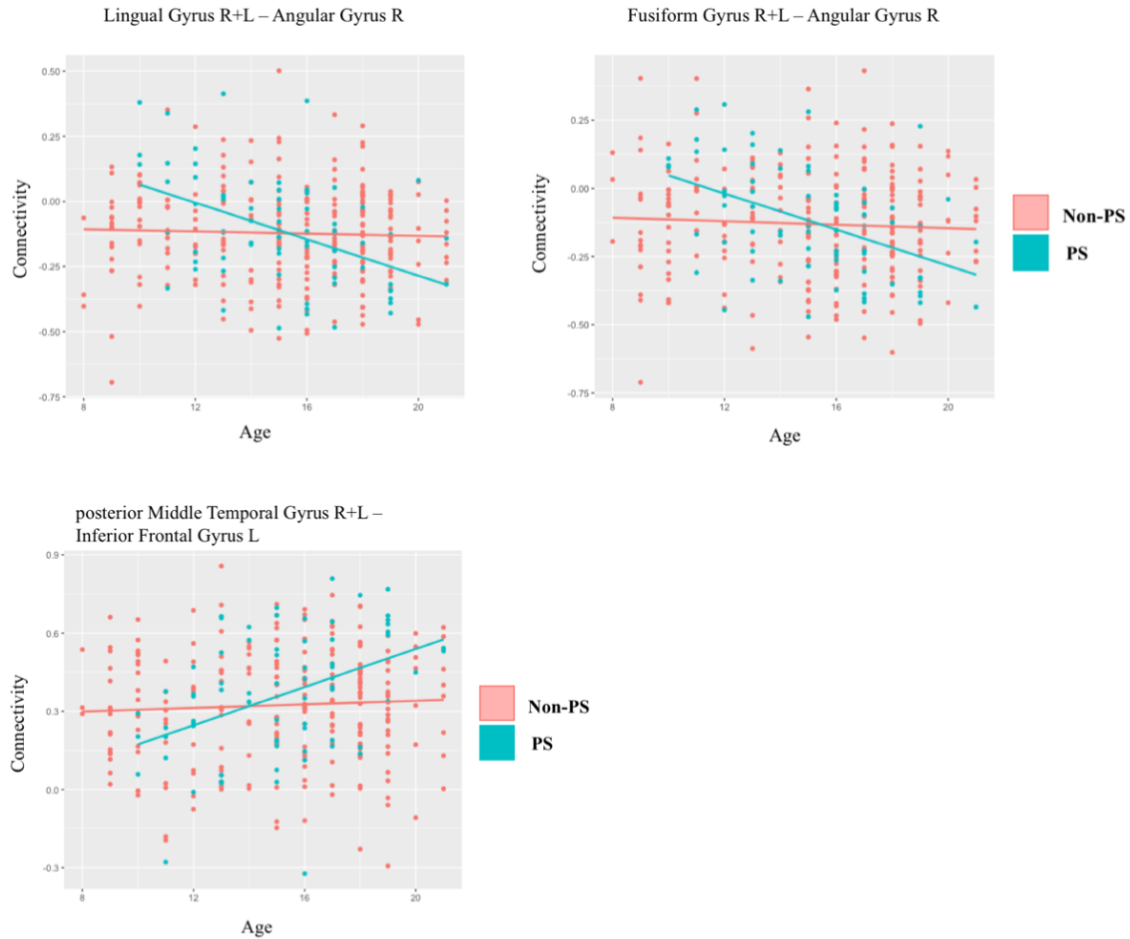

R – right, L – left; PS – participants with psychosis spectrum symptoms, Non-PS – participants without psychosis spectrum symptoms

### State 5 – Globally hypoconnected state

In this state, connectivity across domains appears diminished and functional domains are less distinguishable based on their intra-domain connectivity. Of all windowed FNC matrices, 19% were assigned to this state.

Four ICN-to-ICN connectivity pairs show significant differences between non-PS and PS groups (Table 5): connectivity within the visual domain is reduced in PS, whereas connectivity

between fusiform gyri (visual domain) and middle frontal gyri (CC domain) is increased in PS relative to non-PS youth.

*Table 5: ICN-to-ICN connectivity pairs in state 5 (hypoconnected state) that show significant group effects*

| ICN1               | ICN2                         | Domains | p-value | t-value | Mean connectivity |      | Relationship |
|--------------------|------------------------------|---------|---------|---------|-------------------|------|--------------|
|                    |                              |         |         |         | Non-PS            | PS   |              |
| Cuneus             | Cerebellum                   | VIS-CB  | <0.0001 | -4.28   | 0.39              | 0.37 | PS < non-PS  |
| Fusiform Gyrus R+L | Middle Frontal Gyrus R+L     | VIS-CC  | <0.0001 | 4.14    | 0                 | 0.06 | PS > non-PS  |
| Cuneus             | Inferior Occipital Gyrus R+L | VIS-VIS | <0.0001 | -4.11   | 0.18              | 0.13 | PS < non-PS  |
| Cuneus             | Inferior Occipital Gyrus R+L | VIS-VIS | <0.0001 | -3.88   | 0.16              | 0.1  | PS < non-PS  |

*Dynamic indices – Mean dwell time (MDT) and fraction of time (FT)*

The factor group was not included in either model. Age was negatively associated with the time spent, overall and before transitioning to another state, in states 1 (DMN-CC domain-synchronized state) and 5 (hypoconnected state): younger participants spent more time in these states. FT and MDT increased with age in states 3 (DMN-CC domain-synchronized state) and 4 (hyperconnected state with subcortical antagonism). Results for main effects of additional covariates are presented in the Supplementary Material.

## Discussion

Here, we conducted the first analysis of whole-brain dynamic FNC in youth experiencing PS relative to their peers, revealing several novel findings. First, PS-associated altered connectivity was primarily present in states characterized by synchronization or antagonism of the DMN and CC domains. We extend previous static functional connectivity findings of hyperconnectivity between DMN, salience, and CC domains<sup>11,12</sup> by showing that this pattern is state-dependent; it only occurs in a state characterized by synchronization of the DMN and CC domains, a state that also becomes less frequent with age. Further, dysconnectivity of more basic domains (sensorimotor and visual systems) is revealed in states 3, 4, and 5, completing the picture of whole-brain dysconnectivity patterns associated with PS.

### *Dynamic FNC*

Overall, the most notable difference between whole-brain connectivity patterns of dynamic states across groups is that state 1 is accompanied by positive connectivity between the DMN and the CC domain, whereas state 3 shows antagonism between the DMN and CC, salience, and sensorimotor domains. Changes in connectivity between the DMN and CC domains are important for adapting to cognitive demands,<sup>52,53</sup> and the anterior insula, a major component of the salience domain, has been suggested to modulate connectivity between these domains.<sup>54,55</sup> States 1 and 3 therefore capture snapshots of changing connectivity between the DMN and the CC domains.

By applying multivariate model selection, we found that different sets of covariates were selected for each one of the 5 dynamic states, indicating that group, sex, age, and maternal education have differential contributions to the variance of FNC across different states. The group variable was included in all but one model, and most of the differences between PS and non-PS youth occurred in states 1 and 3.

Developmental rs-fMRI studies of static FNC have shown that connectivity between the DMN and CC domains decreases with age, whereas connectivity *within* these domains increases with age;<sup>56</sup> increased intra-domain connectivity of both domains was also associated with higher IQ.<sup>56,57</sup> Moreover, cross-sectional studies of dynamic FNC across late childhood and adolescence also report increasing FT and MDT with age for states exhibiting DMN-CC antagonism<sup>58</sup>. Rashid et al.<sup>59</sup> recently showed that age-related changes in ICN-to-ICN connectivity and dysconnectivity associated with autistic traits were found primarily in a state showing antagonism between the DMN and CC domains, highlighting the likely relevance of these domains to broader psychopathology.

In line with these findings, we found that MDT and FT of state 3 (DMN-CC domain-antagonized state) increased with age, whereas MDT and FT of state 1 (DMN-CC domain-synchronized state) decreased: older participants tend to spend more time in states exhibiting antagonism between DMN and CC domains and less time in states characterized by synchronization of these domains.

Collectively, these findings suggest that there may be a link between delayed neurocognitive development in PS youth<sup>10</sup> and our findings of focused dysconnectivity in states generally associated with brain maturation and cognition. Future prospective studies are warranted to investigate longitudinal associations between cognitive maturation and dynamic FNC metrics, and how these factors relate to emerging PS over time.

#### State 1 – The DMN-CC domain-synchronized state

In state 1, PS youth exhibited hyperconnectivity of prefrontal brain areas assigned to the salience, CC, and DMN domains relative to non-PS participants. In a recent investigation of the association between static FNC and multiple dimensions of psychopathology in this cohort, PS

were associated with increased connectivity between the DMN, salience, and CC domains.<sup>12</sup> Further, a recent study of dynamic FNC in a CHR cohort found less temporal variability of functional connectivity in regions of the DMN and salience domains relative to healthy controls.<sup>60</sup> PS-associated dysconnectivity between the DMN, salience and CC domains<sup>55,61–64</sup> may be a neural underpinning of the aberrant salience theory of schizophrenia.<sup>65,66</sup> Briefly, this theory posits that naturally occurring internal and external stimuli that are competing for ‘attention’ are falsely categorized as salient, ultimately leading to psychotic symptoms.<sup>63</sup> The insula, a major component of the salience domain, not only detects salient stimuli but also orchestrates connectivity between the DMN and CC domain in response to those stimuli.<sup>54,63</sup>

We also found that, in this state, PS youth showed long-range hypoconnectivity between prefrontal CC areas and the cerebellum and within the DMN. Interestingly, prior studies in healthy adults have associated stronger prefrontal-cerebellar connectivity with better executive functioning.<sup>67</sup> This is another interesting target for future studies.

Relative to non-PS youth, those with PS also exhibited hypoconnectivity in state 1 between the basal ganglia and the sensorimotor domain. Subcortical-cortical dysconnectivity has been implicated in the psychosis spectrum.<sup>38,68,69</sup> Recent findings suggest an association between disruption of the cortico-basal ganglia loop and motor impairments in patients with schizophrenia.<sup>70–72</sup> Moreover, behavioral data indicate that abnormal involuntary movements are linked to psychosis risk in youth,<sup>73</sup> and cortical-subcortical dysconnectivity may be a contributing factor.

### State 3 – DMN-CC domain-antagonized state

State 3 was the most common state in both groups. Here, dysconnectivity in PS participants primarily involved visual and sensorimotor domains. A substantial body of literature indicates

alterations in visual processing in schizophrenia.<sup>74–77</sup> Moreover, behavioral studies in the offspring of patients with psychosis spectrum disorders indicate an association between early visual abnormalities and later development of psychosis.<sup>78,79</sup> Aberrant functional connectivity of the visual domain — which we also observed in states 4 and 5 — might underlie these early perceptual processing impairments associated with PS.

The visual domain was also mainly affected in the group by age interaction in state 4, the hyperconnected state with subcortical antagonism: Connectivity between visual association areas and the angular gyrus showed age-associated decreases in PS youth, which was not observed in non-PS youth. In contrast, connectivity between auditory association cortices and the inferior frontal gyrus increased in PS youth with age which, again, was not observed in non-PS youth. In accordance with these findings, it has been shown that multisensory integration, a function of association cortices, is disrupted in patients with schizophrenia.<sup>80,81</sup>

In summary, our findings of dysconnectivity in sensorimotor, visual, and association cortices could map onto the hypothesis that sensory and motor signs and multisensory integration deficits are indeed among the earliest impairments along the psychosis spectrum.<sup>9</sup>

### *Dynamic indices*

There were no main effects of group for MDT and FT, suggesting that changes in these global metrics may only be detectable at the severe end of the psychosis continuum.<sup>35,38</sup> This notion is supported by previous studies; whereas patients with chronic schizophrenia spent significantly more time in hypoconnected states relative to healthy controls,<sup>38</sup> CHR individuals did not differ from healthy controls in MDT/FT.<sup>35</sup>

## Limitations

Even though PS youth have an increased risk for developing overt psychosis<sup>1,6</sup>, most of them will not develop a psychotic disorder: Longitudinal data are currently not available, but will be essential to understand the development and progression of the psychosis continuum, as well as factors contributing to heterogeneity in outcome. Also, longer rs-fMRI scans may allow more stable FNC estimations.<sup>51,82–84</sup>

## Conclusion

This study provides the first evidence that dynamic functional dysconnectivity is present even at the less severe end of the psychosis continuum, complementing previous work on help-seeking and clinically diagnosed cohorts representing the more severe end of this spectrum.

Taken together, dysconnectivity observed in state 1 highlights networks previously associated with higher-order cognitive impairment in individuals on the psychosis spectrum;<sup>11,12</sup> alterations in other transient states reveal alterations in more basic domains like the visual system. Metrics of time-varying functional connectivity offer promise as future diagnostic or prognostic indicators and potential targets for therapeutic interventions.<sup>29,38,85–89</sup>

## Acknowledgment

We thank Ruby Tow, Alex Dib, Elizabeth Riddle, Kaitlyn Hart, Miranda Madrid, Mengtong Pan, Claire Waller, and Molly Patapoff for their help with data cleaning. Data were downloaded from the database of genotypes and phenotypes (dbGaP, phs000607.v1.p1, first PNC release, C. E. Bearden, #7147). This research was supported by National Institute of Mental Health (NIMH) grants R01 MH107250 (CEB, RAO), R01 MH101506 (KHK), K01 MH112774 (MJ), and K99 MH116115 (LMOL).



## Bibliography

1. David AS, Ajnakina O. Psychosis as a continuous phenotype in the general population: the thin line between normality and pathology. *World Psychiatry*. 2016;15(2):129-130. doi:10.1002/wps.20327
2. DeRosse P, Karlsgodt KH. Examining the Psychosis Continuum. *Curr Behav Neurosci Rep*. 2015;2(2):80-89. doi:10.1007/s40473-015-0040-7
3. Guloksuz S, Os J van. The slow death of the concept of schizophrenia and the painful birth of the psychosis spectrum. *Psychol Med*. 2018;48(2):229-244. doi:10.1017/S0033291717001775
4. American Psychiatric Association. *Diagnostic and Statistical Manual of Mental Disorders (5th Ed.)*. Washington, DC; 2013.
5. McGlashan T, Walsh B, Woods S. *The Psychosis-Risk Syndrome: Handbook for Diagnosis and Follow-Up*. Oxford University Press, USA; 2010.
6. Poulton R, Caspi A, Moffitt TE, Cannon M, Murray R, Harrington H. Children's Self-Reported Psychotic Symptoms and Adult Schizophreniform Disorder: A 15-Year Longitudinal Study. *Arch Gen Psychiatry*. 2000;57(11):1053-1058. doi:10.1001/archpsyc.57.11.1053
7. Linscott RJ, van Os J. An updated and conservative systematic review and meta-analysis of epidemiological evidence on psychotic experiences in children and adults: on the pathway from proneness to persistence to dimensional expression across mental disorders. *Psychol Med*. 2013;43(06):1133-1149. doi:10.1017/S0033291712001626
8. Cannon TD. How Schizophrenia Develops: Cognitive and Brain Mechanisms Underlying Onset of Psychosis. *Trends Cogn Sci*. 2015;19(12):744-756. doi:10.1016/j.tics.2015.09.009
9. Forsyth JK, Lewis DA. Mapping the Consequences of Impaired Synaptic Plasticity in Schizophrenia through Development: An Integrative Model for Diverse Clinical Features. *Trends Cogn Sci*. July 2017. doi:10.1016/j.tics.2017.06.006
10. Gur RC, Calkins ME, Satterthwaite TD, et al. Neurocognitive Growth Charting in Psychosis Spectrum Youths. *JAMA Psychiatry*. 2014;71(4):366. doi:10.1001/jamapsychiatry.2013.4190
11. Satterthwaite TD, Vandekar SN, Wolf DH, et al. Connectome-wide network analysis of youth with Psychosis-Spectrum symptoms. *Mol Psychiatry*. 2015;20(12):1508-1515. doi:10.1038/mp.2015.66
12. Xia CH, Ma Z, Ciric R, et al. Linked dimensions of psychopathology and connectivity in functional brain networks. *Nat Commun*. 2018;9(1):3003. doi:10.1038/s41467-018-05317-y

13. Gogtay N, Giedd JN, Lusk L, et al. Dynamic mapping of human cortical development during childhood through early adulthood. *Proc Natl Acad Sci.* 2004;101(21):8174-8179. doi:10.1073/pnas.0402680101
14. Giedd JN, Blumenthal J, Jeffries NO, et al. Brain development during childhood and adolescence: a longitudinal MRI study. *Nat Neurosci.* 1999;2(10):861-863. doi:10.1038/13158
15. Mills KL, Goddings A-L, Clasen LS, Giedd JN, Blakemore S-J. The Developmental Mismatch in Structural Brain Maturation during Adolescence. *Dev Neurosci.* 2014;36(3-4):147-160. doi:10.1159/000362328
16. Laurens KR, Hobbs MJ, Sunderland M, Green MJ, Mould GL. Psychotic-like experiences in a community sample of 8000 children aged 9 to 11 years: an item response theory analysis. *Psychol Med.* 2012;42(7):1495-1506. doi:10.1017/S0033291711002108
17. Keshavan MS, Giedd J, Lau JYF, Lewis DA, Paus T. Changes in the adolescent brain and the pathophysiology of psychotic disorders. *Lancet Psychiatry.* 2014;1(7):549-558. doi:10.1016/S2215-0366(14)00081-9
18. Paus T, Keshavan M, Giedd JN. Why do many psychiatric disorders emerge during adolescence? *Nat Rev Neurosci.* 2008;9(12):947-957. doi:10.1038/nrn2513
19. Calhoun VD. Functional brain networks in schizophrenia: a review. *Front Hum Neurosci.* 2009;3. doi:10.3389/neuro.09.017.2009
20. Friston K, Brown HR, Siemerikus J, Stephan KE. The dysconnection hypothesis (2016). *Schizophr Res.* 2016;176(2):83-94. doi:10.1016/j.schres.2016.07.014
21. Fornito A, Zalesky A, Pantelis C, Bullmore ET. Schizophrenia, neuroimaging and connectomics. *NeuroImage.* 2012;62(4):2296-2314. doi:10.1016/j.neuroimage.2011.12.090
22. Biswal B, Zerrin Yetkin F, Haughton VM, Hyde JS. Functional connectivity in the motor cortex of resting human brain using echo-planar mri. *Magn Reson Med.* 1995;34(4):537-541.
23. Fox MD, Raichle ME. Spontaneous fluctuations in brain activity observed with functional magnetic resonance imaging. *Nat Rev Neurosci.* 2007;8(9):700-711. doi:10.1038/nrn2201
24. Friston KJ. Functional and Effective Connectivity: A Review. *Brain Connect.* 2011;1(1):13-36. doi:10.1089/brain.2011.0008
25. Matsui T, Murakami T, Ohki K. Neuronal Origin of the Temporal Dynamics of Spontaneous BOLD Activity Correlation. *Cereb Cortex.* 2018. doi:10.1093/cercor/bhy045
26. Chang C, Glover GH. Time-frequency dynamics of resting-state brain connectivity measured with fMRI. *NeuroImage.* 2010;50(1):81-98. doi:10.1016/j.neuroimage.2009.12.011

27. Hutchison RM, Womelsdorf T, Gati JS, Everling S, Menon RS. Resting-state networks show dynamic functional connectivity in awake humans and anesthetized macaques. *Hum Brain Mapp.* 2013;34(9):2154-2177. doi:10.1002/hbm.22058
28. Hutchison RM, Morton JB. Tracking the Brain's Functional Coupling Dynamics over Development. *J Neurosci.* 2015;35(17):6849-6859. doi:10.1523/JNEUROSCI.4638-14.2015
29. Hutchison RM, Womelsdorf T, Allen EA, et al. Dynamic functional connectivity: Promise, issues, and interpretations. *NeuroImage.* 2013;80:360-378. doi:10.1016/j.neuroimage.2013.05.079
30. Satterthwaite TD, Baker JT. How can studies of resting-state functional connectivity help us understand psychosis as a disorder of brain development? *Curr Opin Neurobiol.* 2015;30:85-91. doi:10.1016/j.conb.2014.10.005
31. Allen EA, Damaraju E, Plis SM, Erhardt EB, Eichele T, Calhoun VD. Tracking Whole-Brain Connectivity Dynamics in the Resting State. *Cereb Cortex.* 2012;24(3):663-676. doi:10.1093/cercor/bhs352
32. Chen JE, Chang C, Greicius MD, Glover GH. Introducing co-activation pattern metrics to quantify spontaneous brain network dynamics. *NeuroImage.* 2015;111:476-488. doi:10.1016/j.neuroimage.2015.01.057
33. Lindquist MA, Xu Y, Nebel MB, Caffo BS. Evaluating dynamic bivariate correlations in resting-state fMRI: A comparison study and a new approach. *NeuroImage.* 2014;101:531-546. doi:10.1016/j.neuroimage.2014.06.052
34. Yu Q, Erhardt EB, Sui J, et al. Assessing dynamic brain graphs of time-varying connectivity in fMRI data: Application to healthy controls and patients with schizophrenia. *NeuroImage.* 2015;107:345-355. doi:10.1016/j.neuroimage.2014.12.020
35. Mennigen E, Fryer SL, Rashid B, et al. Transient patterns of functional dysconnectivity in clinical high risk and early-illness schizophrenia individuals compared to healthy controls. *Brain Connect.* June 2018. doi:10.1089/brain.2018.0579
36. Du Y, Fryer SL, Fu Z, et al. Dynamic functional connectivity impairments in early schizophrenia and clinical high-risk for psychosis. *NeuroImage.* October 2017. doi:10.1016/j.neuroimage.2017.10.022
37. Barber AD, Lindquist MA, DeRosse P, Karlsgodt KH. Dynamic Functional Connectivity States Reflecting Psychotic-like Experiences. *Biol Psychiatry Cogn Neurosci Neuroimaging.* 2018;3(5):443-453. doi:10.1016/j.bpsc.2017.09.008
38. Damaraju E, Allen EA, Belger A, et al. Dynamic functional connectivity analysis reveals transient states of dysconnectivity in schizophrenia. *NeuroImage Clin.* 2014;5:298-308. doi:10.1016/j.nicl.2014.07.003

39. Du Y, Pearlson GD, Yu Q, et al. Interaction among subsystems within default mode network diminished in schizophrenia patients: A dynamic connectivity approach. *Schizophr Res*. 2016;170(1):55-65. doi:10.1016/j.schres.2015.11.021
40. Kaufman J, Birmaher B, Brent D, et al. Schedule for Affective Disorders and Schizophrenia for School-Age Children-Present and Lifetime Version (K-SADS-PL): Initial Reliability and Validity Data. *J Am Acad Child Adolesc Psychiatry*. 1997;36(7):980-988. doi:10.1097/00004583-199707000-00021
41. Gur RC, Richard J, Hughett P, et al. A cognitive neuroscience-based computerized battery for efficient measurement of individual differences: Standardization and initial construct validation. *J Neurosci Methods*. 2010;187(2):254-262. doi:10.1016/j.jneumeth.2009.11.017
42. Satterthwaite TD, Elliott MA, Ruparel K, et al. Neuroimaging of the Philadelphia Neurodevelopmental Cohort. *NeuroImage*. 2014;86:544-553. doi:10.1016/j.neuroimage.2013.07.064
43. Calkins ME, Merikangas KR, Moore TM, et al. The Philadelphia Neurodevelopmental Cohort: constructing a deep phenotyping collaborative. *J Child Psychol Psychiatry*. 2015;56(12):1356-1369. doi:10.1111/jcpp.12416
44. Calkins ME, Moore TM, Merikangas KR, et al. The psychosis spectrum in a young US community sample: findings from the Philadelphia Neurodevelopmental Cohort. *World Psychiatry*. 2014;13(3):296–305.
45. Kobayashi H, Nemoto T, Koshikawa H, et al. A self-reported instrument for prodromal symptoms of psychosis: Testing the clinical validity of the PRIME Screen—Revised (PS-R) in a Japanese population. *Schizophr Res*. 2008;106(2-3):356-362. doi:10.1016/j.schres.2008.08.018
46. Merikangas KR, Avenevoli S, Costello EJ, Koretz D, Kessler RC. National Comorbidity Survey Replication Adolescent Supplement (NCS-A): I. Background and Measures. *J Am Acad Child Adolesc Psychiatry*. 2009;48(4):367-379. doi:10.1097/CHI.0b013e31819996f1
47. McGlashan TH, Miller TJ, Woods SW, Hoffman RE, Davidson L. Instrument for the Assessment of Prodromal Symptoms and States. In: Miller T, Mednick SA, McGlashan TH, Libiger J, Johannessen JO, eds. *Early Intervention in Psychotic Disorders*. NATO Science Series. Springer Netherlands; 2001:135-149. doi:10.1007/978-94-010-0892-1\_7
48. Calhoun VD, Adali T, Pearlson GD, Pekar J j. A method for making group inferences from functional MRI data using independent component analysis. *Hum Brain Mapp*. 2001;14(3):140-151. doi:10.1002/hbm.1048
49. Allen EA, Erhardt EB, Damaraju E, et al. A Baseline for the Multivariate Comparison of Resting-State Networks. *Front Syst Neurosci*. 2011;5. doi:10.3389/fnsys.2011.00002

50. Tzourio-Mazoyer N, Landeau B, Papathanassiou D, et al. Automated Anatomical Labeling of Activations in SPM Using a Macroscopic Anatomical Parcellation of the MNI MRI Single-Subject Brain. *NeuroImage*. 2002;15(1):273-289. doi:10.1006/nimg.2001.0978
51. Abrol A, Damaraju E, Miller RL, et al. Replicability of time-varying connectivity patterns in large resting state fMRI samples. *NeuroImage*. September 2017. doi:10.1016/j.neuroimage.2017.09.020
52. Shine JM, Bissett PG, Bell PT, et al. The Dynamics of Functional Brain Networks: Integrated Network States during Cognitive Task Performance. *Neuron*. 2016;92(2):544-554. doi:10.1016/j.neuron.2016.09.018
53. Vatansever D, Menon DK, Manktelow AE, Sahakian BJ, Stamatakis EA. Default Mode Dynamics for Global Functional Integration. *J Neurosci*. 2015;35(46):15254-15262. doi:10.1523/JNEUROSCI.2135-15.2015
54. Menon V, Uddin LQ. Saliency, switching, attention and control: a network model of insula function. *Brain Struct Funct*. 2010;214(5-6):655-667. doi:10.1007/s00429-010-0262-0
55. Goulden N, Khusnulina A, Davis NJ, et al. The salience network is responsible for switching between the default mode network and the central executive network: Replication from DCM. *NeuroImage*. 2014;99:180-190. doi:10.1016/j.neuroimage.2014.05.052
56. Sherman LE, Rudie JD, Pfeifer JH, Masten CL, McNealy K, Dapretto M. Development of the Default Mode and Central Executive Networks across early adolescence: A longitudinal study. *Dev Cogn Neurosci*. 2014;10:148-159. doi:10.1016/j.dcn.2014.08.002
57. Mak LE, Minuzzi L, MacQueen G, Hall G, Kennedy SH, Milev R. The Default Mode Network in Healthy Individuals: A Systematic Review and Meta-Analysis. *Brain Connect*. 2016;7(1):25-33. doi:10.1089/brain.2016.0438
58. Marusak HA, Calhoun VD, Brown S, et al. Dynamic functional connectivity of neurocognitive networks in children: Dynamic Functional Connectivity in Children. *Hum Brain Mapp*. 2017;38(1):97-108. doi:10.1002/hbm.23346
59. Rashid B, Blanken LME, Muetzel RL, et al. Connectivity dynamics in typical development and its relationship to autistic traits and autism spectrum disorder. *Hum Brain Mapp*. 2018;39(8):3127-3142. doi:10.1002/hbm.24064
60. Pelletier-Baldelli A, Andrews-Hanna JR, Mittal VA. Resting state connectivity dynamics in individuals at risk for psychosis. *J Abnorm Psychol*. 2018;127(3):314-325. doi:http://dx.doi.org/10.1037/abn0000330
61. Manoliu A, Riedl V, Zherdin A, et al. Aberrant Dependence of Default Mode/Central Executive Network Interactions on Anterior Insular Salience Network Activity in Schizophrenia. *Schizophr Bull*. 2014;40(2):428-437. doi:10.1093/schbul/sbt037

62. Wotruba D, Michels L, Buechler R, et al. Aberrant Coupling Within and Across the Default Mode, Task-Positive, and Salience Network in Subjects at Risk for Psychosis. *Schizophr Bull*. November 2013;sbt161. doi:10.1093/schbul/sbt161
63. Uddin LQ. Salience processing and insular cortical function and dysfunction. *Nat Rev Neurosci*. 2015;16(1):55–61.
64. Palaniyappan L, Simmonite M, White TP, Liddle EB, Liddle PF. Neural Primacy of the Salience Processing System in Schizophrenia. *Neuron*. 2013;79(4):814-828. doi:10.1016/j.neuron.2013.06.027
65. Palaniyappan L, Liddle PF. Does the salience network play a cardinal role in psychosis? An emerging hypothesis of insular dysfunction. *J Psychiatry Neurosci*. 2012;37(1):17-27. doi:10.1503/jpn.100176
66. Kapur S. Psychosis as a state of aberrant salience: a framework linking biology, phenomenology, and pharmacology in schizophrenia. *Am J Psychiatry*. 2003. <http://ajp.psychiatryonline.org/doi/pdf/10.1176/appi.ajp.160.1.13>. Accessed May 3, 2016.
67. Reineberg AE, Andrews-Hanna JR, Depue BE, Friedman NP, Banich MT. Resting-state networks predict individual differences in common and specific aspects of executive function. *NeuroImage*. 2015;104:69-78. doi:10.1016/j.neuroimage.2014.09.045
68. Anticevic A, Haut K, Murray JD, et al. Association of Thalamic Dysconnectivity and Conversion to Psychosis in Youth and Young Adults at Elevated Clinical Risk. *JAMA Psychiatry*. 2015;72(9):882. doi:10.1001/jamapsychiatry.2015.0566
69. Ferri J, Fryer SL, Roach BJ, Loewy RL, Ford JM, Mathalon DH. Thalamic Dysconnectivity in Individuals at Clinically High Risk for Schizophrenia and During Early Illness. *Schizophr Bull*. 2017;43(suppl\_1):S44-S44. doi:DOI 10.1093/schbul/sbx021.116),
70. Skåtun KC, Kaufmann T, Doan NT, et al. Consistent Functional Connectivity Alterations in Schizophrenia Spectrum Disorder: A Multisite Study. *Schizophr Bull*. 2017;43(4):914-924. doi:10.1093/schbul/sbw145
71. Bracht T, Schnell S, Federspiel A, et al. Altered cortico-basal ganglia motor pathways reflect reduced volitional motor activity in schizophrenia. *Schizophr Res*. 2013;143(2):269-276. doi:10.1016/j.schres.2012.12.004
72. Walther S. Psychomotor symptoms of schizophrenia map on the cerebral motor circuit. *Psychiatry Res Neuroimaging*. 2015;233(3):293-298. doi:10.1016/j.psychres.2015.06.010
73. Kindler J, Schultze-Lutter F, Michel C, et al. Abnormal involuntary movements are linked to psychosis-risk in children and adolescents: Results of a population-based study. *Schizophr Res*. 2016;174(1):58-64. doi:10.1016/j.schres.2016.04.032

74. Chen Y. Abnormal Visual Motion Processing in Schizophrenia: A Review of Research Progress. *Schizophr Bull.* 2011;37(4):709-715. doi:10.1093/schbul/sbr020
75. Silverstein SM, Keane BP. Perceptual Organization Impairment in Schizophrenia and Associated Brain Mechanisms: Review of Research from 2005 to 2010. *Schizophr Bull.* 2011;37(4):690-699. doi:10.1093/schbul/sbr052
76. Butler PD, Silverstein SM, Dakin SC. Visual Perception and Its Impairment in Schizophrenia. *Biol Psychiatry.* 2008;64(1):40-47. doi:10.1016/j.biopsych.2008.03.023
77. Silverstein S, Keane BP, Blake R, Giersch A, Green M, Kéri S. Vision in schizophrenia: why it matters. *Front Psychol.* 2015;6. doi:10.3389/fpsyg.2015.00041
78. Schubert EW, Henriksson KM, McNeil TF. A prospective study of offspring of women with psychosis: visual dysfunction in early childhood predicts schizophrenia-spectrum disorders in adulthood. *Acta Psychiatr Scand.* 2005;112(5):385-393. doi:10.1111/j.1600-0447.2005.00584.x
79. Schiffman J, Maeda JA, Hayashi K, et al. Premorbid childhood ocular alignment abnormalities and adult schizophrenia-spectrum disorder. *Schizophr Res.* 2006;81(2):253-260. doi:10.1016/j.schres.2005.08.008
80. Stevenson RA, Park S, Cochran C, et al. The associations between multisensory temporal processing and symptoms of schizophrenia. *Schizophr Res.* 2017;179:97-103. doi:10.1016/j.schres.2016.09.035
81. Tseng H-H, Bossong MG, Modinos G, Chen K-M, McGuire P, Allen P. A systematic review of multisensory cognitive-affective integration in schizophrenia. *Neurosci Biobehav Rev.* 2015;55:444-452. doi:10.1016/j.neubiorev.2015.04.019
82. Hindriks R, Adhikari MH, Murayama Y, et al. Can sliding-window correlations reveal dynamic functional connectivity in resting-state fMRI? *NeuroImage.* 2016;127:242-256. doi:10.1016/j.neuroimage.2015.11.055
83. Preti MG, Bolton TA, Van De Ville D. The dynamic functional connectome: State-of-the-art and perspectives. *NeuroImage.* 2017;160:41-54. doi:10.1016/j.neuroimage.2016.12.061
84. Miller RL, Adali T, Levin-Schwartz Y, Calhoun VD. Resting-State fMRI Dynamics and Null Models: Perspectives, Sampling Variability, and Simulations. *bioRxiv.* June 2017:153411. doi:10.1101/153411
85. Rashid B, Arbabshirani MR, Damaraju E, et al. Classification of schizophrenia and bipolar patients using static and dynamic resting-state fMRI brain connectivity. *NeuroImage.* 2016;134:645-657. doi:10.1016/j.neuroimage.2016.04.051
86. Kaiser RH, Whitfield-Gabrieli S, Dillon DG, et al. Dynamic Resting-State Functional Connectivity in Major Depression. *Neuropsychopharmacology.* 2016;41(7):1822-1830. doi:10.1038/npp.2015.352

87. de Lacy N, Calhoun VD. Dynamic connectivity and the effects of maturation in youth with attention deficit hyperactivity disorder. *Netw Neurosci*. July 2018:1-41. doi:10.1162/netn\_a\_00063
88. de Lacy N, Doherty D, King BH, Rachakonda S, Calhoun VD. Disruption to control network function correlates with altered dynamic connectivity in the wider autism spectrum. *NeuroImage Clin*. 2017;15:513-524. doi:10.1016/j.nicl.2017.05.024
89. Rashid B, Damaraju E, Pearlson GD, Calhoun VD. Dynamic connectivity states estimated from resting fMRI Identify differences among Schizophrenia, bipolar disorder, and healthy control subjects. *Front Hum Neurosci*. 2014;8. <http://www.ncbi.nlm.nih.gov/pmc/articles/PMC4224100/>. Accessed January 22, 2016.
